# Supplementary material for: Isotopic composition for source identification of mercury in atmosphericfine particles
Source: Copernicus journal article supplement (doi:10.5194/acp-16-11773-2016), 2016-09-22
Supplement: Supplementary file 1 [file acp-16-11773-2016-supplement.pdf]

Supplement of Atmos. Chem. Phys., 16, 11773–11786, 2016  
<http://www.atmos-chem-phys.net/16/11773/2016/>  
doi:10.5194/acp-16-11773-2016-supplement  
© Author(s) 2016. CC Attribution 3.0 License.

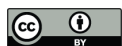

Atmospheric  
Chemistry  
and Physics  
Open Access  
EGU

*Supplement of*

## **Isotopic composition for source identification of mercury in atmospheric fine particles**

**Qiang Huang et al.**

*Correspondence to:* Jiubin Chen ([chenjiubin@vip.gyig.ac.cn](mailto:chenjiubin@vip.gyig.ac.cn))

The copyright of individual parts of the supplement might differ from the CC-BY 3.0 licence.

|          |                                                                   |
|----------|-------------------------------------------------------------------|
| Page S2  | Calculation of Enrichment Factor and Principal Component Analysis |
| Page S3  | Calculation of Secondary Organic Carbon                           |
| Page S5  | Table S1                                                          |
| Page S6  | Table S2                                                          |
| Page S7  | Table S3                                                          |
| Page S8  | Table S4                                                          |
| Page S9  | Table S5                                                          |
| Page S10 | Figure S1                                                         |
| Page S11 | Figure S2                                                         |
| Page S12 | Figure S3                                                         |
| Page S13 | Figure S4                                                         |
| Page S14 | References                                                        |

## Calculation of Enrichment Factor

The enrichment factor (EF) of a given element (e.g., Hg) in a sample is defined as the content of that element relative to its abundance in the upper continental crust (UCC) (Rudnick and Gao, 2003) in comparison with a process-insensitive element (e.g. Al, Fe, Ti, Si). In this study, we use Al as the process-insensitive element because Al is a main component of UCC and it presumably has little or no contribution from anthropogenic sources (Chen et al., 2014). The EF of an element of interest ( $C_{xx}$ ) is calculated using the following equation:

$$EF_{xx} = (C_{xx}/C_{Al})_{\text{sample}} / (C_{xx}/C_{Al})_{\text{ucc}}$$

The EF values calculated for the PM<sub>2.5</sub> samples are listed in [Table S4](#). In general, the elements with EF values between 5 and 10 in geochemical samples are considered to have significant contribution from non-crustal sources, whereas the elements with high EF values (>10) are essentially from anthropogenic activities (Chen et al., 2014).

## Principal Component Analysis

Four factors are extracted from the Varimax rotated Principal Component Analysis, which accounted for 93% of the Explained Variance (Expl. Var.) of the entire data set. This finding is consistent with a previous report (Schleicher et al., 2015). The factor loadings are listed in [Table S5](#).

Factor **F-1** explains 39% of the total variance of the data, which is characterized by high loadings of the elements (Pb, Rb, Se, Zn, Tl, Cr, Cd, Fe and Ni) from mainly anthropogenic sources. After the phase-out of leaded gasoline in China since 1997, vehicle emission has not been the major emission source of Pb in airborne PM. Instead, coal combustion has since become the major source of Pb in PM (Zhang et al., 2009; Xu et al., 2012). Meanwhile, Se,

Cd and Zn with high contents were also considered mainly from coal combustion (Schleicher et al., 2012). Although many coal-fired power plants have been closed or replaced by gas-fired stations in Beijing, coal consumption is still huge in Beijing, particular in coal combustion for winter heating mainly used outside the 5<sup>th</sup> ring road of Beijing (Lin et al., 2016). Previous study showed that the petroleum refining and pollutant associated with petrochemical industry may be important sources of primary fine particles in Beijing, but they are not the main sources of PM<sub>2.5</sub> (Lin et al., 2016). In addition to coal combustion, industrial activities (e.g. metallurgical processes) might also contribute to these element associations, as evidence by the highest EFs of Se, Cd, Pb, Zn, Tl and Cr in two dust samples from the smelting plant (Table S4). As a result, **F-1** is labeled as “mixed anthropogenic factor” mainly comprise coal combustion and nonferrous metal smelting. Factor **F-2** is characterized by high loading of Ca, Sr, Al and Mg which explains 24% of the total variance and indicated the lithogenic source contribution. Possible anthropogenic sources might be from construction activities as Ca, Sr, Al and Mg contents are high in cement materials, such as concrete mortar, lime or bricks (Schleicher et al., 2015). Additionally typical host minerals for these elements with low EFs (Table S4) may be from windblown dust (Visser et al., 2015). Collectively, Factor **F-1** and **F-2** can be labeled as a combination of coal combustion, nonferrous metal smelting and building materials that have high loading of Hg.

Factor **F-3** is characterized by high contents of Sb, Cu, PM<sub>2.5</sub> and EC, accounting for 23% of the total variance. Since Sb and Cu in urban aerosols are mainly from brake wear of vehicles (Visser et al., 2015), this factor may be best referred to as “traffic emission factor”. Factor **F-4** is dominated by K and Na, which has been reported mainly from the biomass burning (Zheng et al., 2005a; Zheng et al., 2005b). Low loading of Hg in factors **F-3** and **F-4**

suggest traffic emission and biomass burning sources may be not the major contributors for PM<sub>2.5</sub>-bound Hg.

### **Calculation of Secondary Organic Carbon**

50       Secondary organic carbon (SOC) is frequently used to evaluate the efficiency of secondary aerosol production in the literature (Castro et al., 1999; Yu et al., 2004; Rengarajan et al., 2011). Here we use the EC-tracer method to estimate the SOC by employing the equation of  $SOC = OC - EC * (OC/EC)_{min}$  (Castro et al., 1999; Cao et al., 2004; Yu et al., 2004; Rengarajan et al., 2011), and by assuming the minimum OC/EC ratio as the primary ratio  
55       (Rengarajan et al., 2011). In this study, the  $(OC/EC)_{min}$  of 2.02 observed for PM<sub>2.5</sub> is used in the calculation.

**Table S1.** Total 23 PM<sub>2.5</sub> samples were collected in four seasons from Beijing of China, and their sampling information, mercury concentrations and isotope compositions are displayed and their seasonal average and total average values are also given below.

| Season        | No.     | Date       | Rain (mm)      | Arriving air mass | Sunshine duration (hr) | T <sup>a</sup> (°C) | RH <sup>b</sup> (%) | PM <sub>2.5</sub> (µg/m <sup>3</sup> ) | THg (ng/g) | THg (pg/m <sup>3</sup> ) | OC (µg/m <sup>3</sup> ) | EC (µg/m <sup>3</sup> ) | OC (mg/g) | EC (mg/g) | δ <sup>202</sup> Hg (‰) | Δ <sup>199</sup> Hg (‰) | Δ <sup>200</sup> Hg (‰) | Δ <sup>201</sup> Hg (‰) | Δ <sup>204</sup> Hg (‰) |
|---------------|---------|------------|----------------|-------------------|------------------------|---------------------|---------------------|----------------------------------------|------------|--------------------------|-------------------------|-------------------------|-----------|-----------|-------------------------|-------------------------|-------------------------|-------------------------|-------------------------|
| Autumn        | PM-01   | 2013-9-30  | n <sup>c</sup> | SE                | 0                      | 19.2                | 78                  | 205                                    | 505        | 103                      | 13.8                    | 5.9                     | 67        | 29        | 0.51                    | -0.53                   | 0.17                    | -0.31                   | -0.23                   |
|               | PM-02   | 2013-10-1  | 12             | NW                | 3.6                    | 18.5                | 81                  | 56                                     | 319        | 18                       | 4.8                     | 1.6                     | 86        | 29        | -0.77                   | -0.07                   | 0.06                    | -0.02                   | -0.81                   |
|               | PM-03   | 2013-10-2  | n              | NW                | 10.9                   | 17.1                | 50                  | 61                                     | 461        | 28                       | 5.8                     | 2.7                     | 95        | 44        | -1.23                   | 0.11                    | 0.09                    | 0.10                    | -0.80                   |
|               | PM-04   | 2013-10-3  | n              | S                 | 9.4                    | 15.4                | 70                  | 108                                    | 1520       | 164                      | 7.2                     | 3.5                     | 66        | 33        | 0.08                    | 0.02                    | 0.10                    | 0.09                    | -0.22                   |
|               | PM-05   | 2013-10-4  | n              | SW                | 4.7                    | 16.6                | 74                  | 237                                    | 888        | 211                      | 18.4                    | 6.6                     | 77        | 28        | -0.31                   | -0.38                   | 0.07                    | -0.48                   | -0.16                   |
|               | PM-06   | 2013-10-5  | n              | S                 | 5.3                    | 18.3                | 74                  | 308                                    | 680        | 210                      | 33.2                    | 9.2                     | 108       | 30        | -0.40                   | -0.29                   | 0.06                    | -0.35                   | -0.25                   |
|               | Average |            |                |                   | 17.5                   | 71                  | 163                 | 728                                    | 122        | 13.9                     | 4.9                     | 83                      | 32        | -0.35     | -0.19                   | 0.09                    | -0.16                   | -0.41                   |                         |
|               | 1SD     |            |                |                   | 1.4                    | 11                  | 103                 | 433                                    | 87         | 10.8                     | 2.8                     | 16                      | 6         | 0.61      | 0.25                    | 0.04                    | 0.25                    | 0.31                    |                         |
| Winter        | PM-07   | 2013-12-17 | n              | N                 | 1.1                    | -0.6                | 49                  | 70                                     | 516        | 36                       | 7.6                     | 2.5                     | 108       | 36        | -1.08                   | 0.04                    | 0.08                    | 0.05                    | 0.11                    |
|               | PM-08   | 2013-12-18 | n              | N                 | 7.7                    | -4.4                | 37                  | 83                                     | 2200       | 182                      | 12.3                    | 4.1                     | 149       | 49        | -0.67                   | -0.12                   | 0.02                    | -0.16                   | 0.04                    |
|               | PM-09   | 2013-12-19 | n              | N                 | 8.3                    | -4.5                | 44                  | 84                                     | 1350       | 113                      | 15.7                    | 5.1                     | 186       | 61        | -0.61                   | 0.04                    | 0.08                    | 0.07                    | -0.19                   |
|               | PM-10   | 2013-12-20 | n              | N                 | 8                      | -2.8                | 36                  | 67                                     | 925        | 62                       | 9.3                     | 3.3                     | 140       | 50        | -1.22                   | -0.09                   | 0.03                    | -0.09                   | -0.07                   |
|               | PM-11   | 2013-12-21 | n              | N                 | 7                      | -2.4                | 36                  | 120                                    | 1250       | 150                      | 25.8                    | 6.7                     | 215       | 56        | -0.25                   | -0.25                   | 0.09                    | -0.19                   | -0.18                   |
|               | PM-12   | 2013-12-22 | n              | NW                | 5.3                    | -3.3                | 52                  | 174                                    | 1790       | 311                      | 41.7                    | 8.8                     | 240       | 50        | -0.46                   | -0.10                   | 0.04                    | -0.12                   | -0.25                   |
|               | Average |            |                |                   | -3.0                   | 42                  | 100                 | 1340                                   | 142        | 18.7                     | 5.1                     | 173                     | 50        | -0.72     | -0.08                   | 0.06                    | -0.07                   | -0.09                   |                         |
|               | 1SD     |            |                |                   | 1.4                    | 7                   | 41                  | 599                                    | 99         | 13.0                     | 2.3                     | 49                      | 8         | 0.37      | 0.11                    | 0.03                    | 0.11                    | 0.14                    |                         |
| Spring        | PM-13   | 2014-4-22  | n              | SW                | 11.2                   | 19.7                | 39                  | 125                                    | 659        | 82                       | 8.6                     | 2.9                     | 69        | 23        | -0.51                   | 0.40                    | 0.10                    | 0.36                    | -0.17                   |
|               | PM-14   | 2014-4-23  | n              | S                 | 8.8                    | 20                  | 60                  | 140                                    | 505        | 71                       | 8.0                     | 2.3                     | 57        | 16        | -1.40                   | 0.57                    | 0.08                    | 0.34                    | -0.18                   |
|               | PM-15   | 2014-4-26  | 14             | NW                | 8.8                    | 15.6                | 63                  | 91                                     | 252        | 23                       | 5.3                     | 1.5                     | 58        | 17        | -0.55                   | 0.23                    | 0.12                    | 0.23                    | -0.43                   |
|               | PM-16   | 2014-4-27  | n              | N                 | 11.3                   | 17.6                | 52                  | 99                                     | 440        | 44                       | 7.2                     | 2.0                     | 72        | 20        | -1.13                   | 0.14                    | 0.09                    | 0.07                    | -0.11                   |
|               | PM-17   | 2014-4-28  | n              | N                 | 11.3                   | 18.8                | 42                  | 111                                    | 485        | 54                       | 8.6                     | 2.7                     | 77        | 24        | -1.45                   | 0.50                    | 0.08                    | 0.32                    | -0.08                   |
|               | PM-18   | 2014-4-29  | n              | NW                | 10.9                   | 19.3                | 41                  | 126                                    | 679        | 85                       | 8.9                     | 3.5                     | 71        | 28        | -0.37                   | 0.33                    | 0.11                    | 0.32                    | -0.39                   |
|               | Average |            |                |                   | 18.5                   | 50                  | 115                 | 503                                    | 60         | 7.7                      | 2.5                     | 67                      | 21        | -0.90     | 0.36                    | 0.10                    | 0.27                    | -0.23                   |                         |
|               | 1SD     |            |                |                   | 1.7                    | 10                  | 18                  | 157                                    | 24         | 1.4                      | 0.7                     | 8                       | 5         | 0.48      | 0.16                    | 0.02                    | 0.11                    | 0.15                    |                         |
| Summer        | PM-19   | 2014-6-29  | n              | S                 | 10.8                   | 28.8                | 46                  | 78                                     | 221        | 17                       | 7.6                     | 2.2                     | 98        | 28        | -2.18                   | 0.54                    | 0.10                    | 0.33                    | 0.41                    |
|               | PM-20   | 2014-6-30  | n              | S                 | 0                      | 29.8                | 52                  | 88                                     | 289        | 25                       | 6.8                     | 2.1                     | 77        | 24        | -0.73                   | 0.11                    | 0.12                    | 0.03                    | -0.54                   |
|               | PM-21   | 2014-7-1   | 49             | S                 | 0                      | 28.8                | 85                  | 72                                     | 150        | 11                       | 2.8                     | 1.2                     | 40        | 16        | -0.80                   | -0.05                   | 0.16                    | -0.13                   | 0.36                    |
|               | PM-22   | 2014-7-2   | n              | SW                | 0.5                    | 23.4                | 78                  | 123                                    | 243        | 30                       | 5.9                     | 2.0                     | 48        | 16        | -0.84                   | 0.06                    | 0.08                    | 0.06                    | -0.11                   |
|               | PM-23   | 2014-7-3   | n              | SW                | 1.4                    | 26.1                | 77                  | 128                                    | 223        | 29                       | 6.2                     | 2.4                     | 49        | 19        | 0.04                    | -0.04                   | 0.17                    | -0.07                   | -0.77                   |
|               |         | Average    |                |                   |                        | 27.4                | 68                  | 98                                     | 225        | 22                       | 5.9                     | 2.0                     | 53        | 18        | -0.90                   | 0.12                    | 0.13                    | 0.04                    | -0.13                   |
|               | 1SD     |            |                |                   | 2.6                    | 17                  | 26                  | 50                                     | 8          | 1.8                      | 0.5                     | 31                      | 8         | 0.80      | 0.24                    | 0.04                    | 0.18                    | 0.53                    |                         |
| Total average |         |            |                |                   | 14.6                   | 57                  | 120                 | 720                                    | 90         | 11.8                     | 3.7                     | 98                      | 32        | -0.71     | 0.05                    | 0.09                    | 0.02                    | -0.22                   |                         |
|               | 1SD     |            |                |                   | 11.4                   | 17                  | 61                  | 551                                    | 80         | 9.6                      | 2.3                     | 54                      | 14        | 0.58      | 0.29                    | 0.04                    | 0.23                    | 0.31                    |                         |

<sup>a</sup> the daily average temperature; <sup>b</sup> the daily average relative humidity; <sup>c</sup> n is not detectable.

60 **Table S2.** Mercury concentrations and isotopic compositions for the 30 solid materials from different potential emission sources in China.

| No.     | Type                       | From                                          | THg<br>(ng/g) | $\delta^{202}\text{Hg}$<br>(‰) | $\Delta^{199}\text{Hg}$<br>(‰) | $\Delta^{200}\text{Hg}$<br>(‰) | $\Delta^{201}\text{Hg}$<br>(‰) | $\Delta^{204}\text{Hg}$<br>(‰) |
|---------|----------------------------|-----------------------------------------------|---------------|--------------------------------|--------------------------------|--------------------------------|--------------------------------|--------------------------------|
| TSP     | Total suspended particle   | Air of Yanqing district, northwestern Beijing | 89            | -0.74                          | 0.18                           | 0.01                           | 0.06                           | -0.15                          |
| TS-01   | Topsoil                    | Beijing, Olympic Park                         | 408           | -1.11                          | 0.10                           | 0.02                           | 0.03                           | -0.09                          |
| TS-02   | Topsoil                    | Beijing, Beihai Park                          | 7747          | -1.14                          | 0.07                           | 0.02                           | 0.01                           | -0.10                          |
| TS-03   | Topsoil                    | Beijing, the Winter Palace                    | 40            | -0.59                          | 0.03                           | 0.02                           | 0.06                           | -0.24                          |
| TS-04   | Topsoil                    | Beijing, Renmin University of China (RUC)     | 146           | -0.77                          | 0.04                           | 0.04                           | 0.08                           | -0.08                          |
| SM-D-01 | Roof dust                  | Beijing, RUC                                  | 94            | 0.35                           | 0.15                           | 0.11                           | 0.22                           | -0.44                          |
| SM-D-02 | Road dust                  | Beijing, RUC                                  | 24            | -0.79                          | 0.18                           | 0.10                           | 0.27                           | -0.41                          |
| TS-05   | Suburban topsoil           | Shijiazhuang city                             | 23            | -1.37                          | -0.02                          | 0.03                           | -0.04                          | -0.01                          |
| SM-D-03 | Urban road dust            | Shijiazhuang city                             | 119           | -0.75                          | 0.04                           | 0.06                           | 0.07                           | -0.03                          |
| SM-D-04 | Urban road dust            | Shijiazhuang city                             | 30            | -0.66                          | -0.05                          | 0.06                           | -0.03                          | -0.15                          |
| SM-D-05 | Suburban road dust         | Shijiazhuang city                             | 70            | -0.78                          | 0.10                           | 0.06                           | -0.03                          | 0.10                           |
| SM-D-06 | Suburban road dust         | Shijiazhuang city                             | 117           | -0.77                          | 0.07                           | 0.07                           | 0.03                           | 0.03                           |
| CFPP-01 | Feed coal                  | Coal-fired power plant -1 <sup>a</sup>        | 191           | -1.26                          | 0.02                           | 0.03                           | 0.04                           | -0.09                          |
| CFPP-02 | Feed coal                  | Coal-fired power plant -2 <sup>b</sup>        | 54            | -1.78                          | -0.27                          | -0.02                          | -0.25                          | 0.11                           |
| CFPP-03 | Bottom ash                 | Coal-fired power plant -1                     | 2.1           | -2.26                          | 0.03                           | -0.01                          | -0.05                          | -0.09                          |
| CFPP-04 | Bottom ash                 | Coal-fired power plant -2                     | 0.35          | 0.48                           | -0.23                          | -0.04                          | -0.19                          | 0.03                           |
| CFPP-05 | Desulfurization gypsum     | Coal-fired power plant -1                     | 142           | -0.58                          | 0.02                           | 0.01                           | 0.00                           | 0.01                           |
| CFPP-06 | Desulfurization gypsum     | Coal-fired power plant -2                     | 6.8           | 0.62                           | -0.17                          | -0.03                          | -0.16                          | 0.06                           |
| CFPP-07 | Fly ash                    | Coal-fired power plant -1                     | 332           | -2.67                          | -0.20                          | -0.04                          | -0.21                          | -0.06                          |
| CFPP-08 | Fly ash                    | Coal-fired power plant -2                     | 875           | -1.37                          | 0.03                           | 0.03                           | 0.01                           | -0.04                          |
| SP-01   | Blast furnace dust         | Smelting plant <sup>c</sup>                   | 113           | -2.48                          | -0.11                          | 0.00                           | -0.07                          | -0.07                          |
| SP-02   | Sintering dust             | Smelting plant                                | 10800         | -0.84                          | -0.17                          | -0.01                          | -0.13                          | -0.09                          |
| SP-03   | Coke                       | Smelting plant                                | 30            | -0.72                          | -0.09                          | 0.00                           | -0.03                          | -0.07                          |
| SP-04   | Return powder              | Smelting plant                                | 1280          | -0.42                          | -0.14                          | 0.02                           | -0.12                          | -0.01                          |
| SP-05   | Dust of blast furnace slag | Smelting plant                                | 27            | -0.42                          | -0.08                          | 0.01                           | -0.07                          | -0.07                          |
| SP-06   | Agglomerate                | Smelting plant                                | 29            | -0.32                          | -0.12                          | -0.01                          | -0.07                          | 0.07                           |
| CP-01   | Coal-1                     | Cement plant <sup>d</sup>                     | 471           | -1.74                          | -0.09                          | 0.01                           | -0.11                          | 0.04                           |
| CP-02   | Coal-2                     | Cement plant <sup>e</sup>                     | 38            | -1.55                          | -0.07                          | 0.05                           | -0.13                          | -0.13                          |
| CP-03   | Raw meal                   | Cement plant                                  | 241           | -1.99                          | -0.07                          | 0.00                           | -0.13                          | -0.07                          |
| CP-04   | Sandstone                  | Cement plant <sup>e</sup>                     | 13            | -1.02                          | 0.04                           | 0.06                           | -0.03                          | -0.03                          |
| CP-05   | Clay                       | Cement plant <sup>e</sup>                     | 17            | -1.79                          | -0.22                          | 0.02                           | -0.29                          | -0.05                          |
| CP-06   | Limestone                  | Cement plant <sup>e</sup>                     | 13            | -1.43                          | -0.07                          | -0.02                          | -0.03                          | 0.08                           |
| CP-07   | Desulfurization gypsum     | Cement plant                                  | 1180          | -1.47                          | -0.02                          | 0.06                           | -0.02                          | -0.20                          |
| CP-08   | Steel slag                 | Cement plant <sup>e</sup>                     | 111           | -1.02                          | 0.00                           | -0.01                          | 0.03                           | -0.03                          |
| CP-09   | Sulfuric acid residue      | Cement plant                                  | 278           | -0.97                          | 0.02                           | 0.00                           | 0.10                           | -0.11                          |
| CP-10   | Cement clinker             | Cement plant <sup>e</sup>                     | 0.94          | -1.18                          | 0.00                           | 0.01                           | 0.06                           | -0.08                          |

<sup>a</sup> a coal-fire power plant from Hubei province; <sup>b</sup> a coal-fire power plant from Mongolia province; <sup>c</sup> a smelting plant from Qinghai province; <sup>d</sup> a cement plant from Sichuan province; <sup>e</sup> data have been published in our previous work (Wang et al., 2015).

**Table S3.** Concentrations of metal elements of the 14 PM<sub>2.5</sub> samples from Beijing and 16 samples of the potential source materials.

| Sample  | Al*  | Cd    | Co   | Cr   | Cu   | Fe*  | Li   | Ni   | Pb     | Rb   | Sb   | Se   | Sr   | Tl   | V    | Zn   | Ca*  | K*   | Mg*  | Na*  |
|---------|------|-------|------|------|------|------|------|------|--------|------|------|------|------|------|------|------|------|------|------|------|
| PM-01   | 3.06 | 13.4  | 7.86 | 64.9 | 367  | 5.64 | 9.19 | 28.6 | 832    | 27.9 | 76.4 | 29.0 | 36.3 | 12.0 | 32.2 | 2.02 | 5.64 | 5.68 | 1.26 | 4.04 |
| PM-02   | 5.59 | 8.03  | 7.10 | 79.0 | 201  | 8.81 | 8.76 | 23.0 | 316    | 27.7 | 34.5 | 29.5 | 64.0 | 7.68 | 20.0 | 0.75 | 15.5 | 2.56 | 3.18 | 3.96 |
| PM-03   | 9.04 | 10.6  | 10.1 | 114  | 225  | 11.8 | 14.3 | 37.9 | 449    | 27.8 | 37.0 | 20.2 | 108  | 6.96 | 25.1 | 1.10 | 32.1 | 5.66 | 11.2 | 3.36 |
| PM-04   | 5.83 | 24.9  | 10.0 | 125  | 251  | 16.8 | 17.1 | 72.7 | 2710   | 115  | 27.0 | 85.9 | 72.7 | 22.0 | 50.8 | 4.28 | 18.4 | 15.1 | 6.41 | 6.61 |
| PM-05   | 3.53 | 21.5  | 6.25 | 72.7 | 294  | 8.90 | 11.5 | 38.6 | 2130   | 76.1 | 49.0 | 62.5 | 44.7 | 19.8 | 27.9 | 3.50 | 7.09 | 12.8 | 2.23 | 3.90 |
| PM-06   | 3.42 | 17.7  | 4.45 | 43.8 | 332  | 5.82 | 11.8 | 24.8 | 942    | 34.0 | 46.2 | 42.8 | 39.0 | 12.8 | 28.8 | 2.32 | 5.78 | 10.2 | 1.39 | 2.92 |
| PM-08   | 10.1 | 14.9  | 13.4 | 85.6 | 217  | 14.0 | 16.5 | 62.5 | 709    | 43.7 | 42.3 | 30.6 | 172  | 11.0 | 33.2 | 1.39 | 34.8 | 10.4 | 8.32 | 8.34 |
| PM-10   | 15.8 | 12.0  | 16.7 | 117  | 298  | 21.1 | 21.2 | 89.1 | 561    | 46.8 | 82.3 | 21.5 | 264  | 9.84 | 46.5 | 2.25 | 42.1 | 22.0 | 9.80 | 13.7 |
| PM-11   | 8.73 | 18.0  | 11.6 | 88.5 | 341  | 11.4 | 30.5 | 48.1 | 1110   | 45.9 | 64.9 | 48.2 | 152  | 14.9 | 29.7 | 2.22 | 31.0 | 26.2 | 7.72 | 11.3 |
| PM-12   | 7.97 | 19.2  | 12.4 | 83.9 | 269  | 10.8 | 22.2 | 45.3 | 1050   | 47.0 | 54.5 | 48.1 | 165  | 15.4 | 27.6 | 2.39 | 19.1 | 3.83 | 4.61 | 3.77 |
| PM-14   | 5.85 | 25.9  | 4.77 | 55.3 | 182  | 7.18 | 14.4 | 25.6 | 873    | 39.1 | 17.3 | 55.0 | 63.2 | 13.1 | 26.1 | 1.80 | 14.5 | 10.3 | 4.85 | 3.69 |
| PM-17   | 12.1 | 13.0  | 9.29 | 77.0 | 188  | 12.3 | 18.1 | 30.9 | 574    | 41.5 | 46.3 | 33.3 | 93.2 | 9.02 | 39.4 | 1.41 | 25.1 | 9.99 | 7.74 | 4.51 |
| PM-19   | 5.03 | 19.5  | 6.19 | 75.4 | 316  | 9.60 | 13.5 | 32.2 | 1340   | 65.4 | 35.0 | 60.0 | 52.6 | 19.8 | 47.8 | 2.53 | 13.7 | 11.4 | 3.93 | 6.01 |
| PM-22   | 1.51 | 21.2  | 2.72 | 47.2 | 412  | 3.10 | 7.49 | 18.0 | 734    | 25.4 | 25.4 | 34.7 | 19.5 | 14.9 | 18.7 | 2.01 | 2.92 | 4.26 | -    | 3.60 |
| SM-D-01 | 57.0 | 2.50  | 13.6 | 91.6 | 73.4 | 34.4 | 40.2 | 57.0 | 97.8   | 77.3 | 4.94 | 2.46 | 249  | 0.99 | 82.3 | 0.45 | 44.5 | 16.8 | 17.7 | 9.33 |
| SM-D-02 | 61.6 | 0.57  | 5.11 | 27.1 | 7.72 | 15.5 | 15.6 | 9.50 | 19.6   | 89.7 | 0.47 | 0.69 | 515  | 0.60 | 48.9 | 0.05 | 27.5 | 29.0 | 8.74 | 17.6 |
| SM-D-03 | 57.6 | 1.52  | 12.4 | 101  | 33.3 | 35.8 | 42.2 | 27.2 | 45.1   | 69.1 | 1.55 | 3.45 | 325  | 0.58 | 102  | 0.32 | 71.3 | 15.7 | 14.3 | 12.2 |
| SM-D-05 | 49.0 | 1.09  | 10.0 | 77.5 | 56.3 | 31.4 | 27.8 | 22.0 | 42.2   | 74.7 | 1.46 | 1.65 | 278  | 0.62 | 71.6 | 0.26 | 71.7 | 17.8 | 20.0 | 9.39 |
| TS-01   | 60.6 | 11.2  | 11.1 | 52.3 | 28.4 | 25.0 | 30.7 | 26.7 | 190    | 96.0 | 1.62 | 1.80 | 315  | 0.91 | 72.9 | 0.13 | 24.7 | 21.2 | 8.95 | 12.4 |
| TS-02   | 50.9 | 0.96  | 10.0 | 56.0 | 50.8 | 22.2 | 28.4 | 22.7 | 93.5   | 82.5 | 1.82 | 2.48 | 423  | 0.74 | 64.2 | 0.11 | 61.8 | 17.7 | 9.36 | 9.83 |
| TS-03   | 63.0 | 2.63  | 12.4 | 71.0 | 21.6 | 27.2 | 28.0 | 24.9 | 40.8   | 85.1 | 1.27 | 2.44 | 318  | 0.82 | 74.6 | 0.10 | 34.5 | 20.0 | 14.8 | 14.0 |
| CFPP-07 | 113  | 3.18  | 39.8 | 111  | 138  | 55.0 | 71.0 | 76.5 | 86.2   | 233  | 3.14 | 6.04 | 369  | 4.23 | 237  | 0.24 | 10.3 | 21.8 | 3.89 | 6.55 |
| CFPP-08 | 125  | 3.85  | 27.5 | 163  | 141  | 64.4 | 227  | 62.0 | 84.6   | 90.2 | 2.47 | 26.6 | 1680 | 1.53 | 348  | 0.16 | 32.2 | 19.0 | 5.95 | 3.74 |
| CP-03   | 11.4 | 6.31  | 17.9 | 243  | 21.7 | 16.6 | 15.9 | 30.7 | 39.2   | 21.3 | 0.76 | 1.41 | 161  | 37.6 | 275  | 0.06 | 302  | 3.54 | 4.05 | 1.20 |
| CP-04   | 40.8 | 1.16  | 7.99 | 36.6 | 14.3 | 20.8 | 27.6 | 18.1 | 14.6   | 60.5 | 1.43 | 2.95 | 77.6 | 0.65 | 54.4 | 0.05 | 39.8 | 11.7 | 6.87 | 0.79 |
| CP-05   | 108  | 1.21  | 23.1 | 88.8 | 29.4 | 55.9 | 40.7 | 40.6 | 19.6   | 84.5 | 0.44 | 2.02 | 179  | 0.78 | 175  | 0.10 | 6.71 | 18.2 | 5.65 | 9.42 |
| CP-10   | 20.9 | 3.43  | 23.3 | 584  | 38.3 | 28.8 | 26.9 | 54.8 | 50.8   | 33.1 | 1.28 | 1.39 | 222  | 0.14 | 637  | 0.13 | 446  | 5.35 | 6.33 | 0.87 |
| SP-01   | 0.71 | 68800 | 1.43 | 2.34 | 132  | 1.61 | 4.18 | 1.33 | 369000 | 108  | 68.7 | 260  | 6.16 | 27.2 | 0.47 | 76.4 | 1.12 | 9.81 | 0.57 | 1.59 |
| SP-02   | 0.08 | 94100 | 0.80 | 2.43 | 269  | 1.03 | 2.66 | 1.67 | 625000 | 109  | 262  | 401  | 4.35 | 2100 | 0.10 | 4.23 | 0.30 | 10.9 | 0.40 | 2.65 |
| SP-04   | 10.3 | 11700 | 21.7 | 216  | 2840 | 99.1 | 9.05 | 90.1 | 400000 | 24.3 | 228  | 92.0 | 281  | 61.3 | 13.8 | 41.1 | 43.3 | 3.01 | 7.12 | 2.58 |

\* units of µg/g, others with units of ng/g.



65 **Table S4.** The calculated enrichment factors (EFs) in PM<sub>2.5</sub> samples and potential source materials.

| Sample  | Cd         | Co | Cr | Cu    | Fe | Li  | Ni | Pb       | Rb   | Sb     | Se      | Sr | Tl      | V  | Zn     | Ca | K   | Mg | Na  | Hg     |
|---------|------------|----|----|-------|----|-----|----|----------|------|--------|---------|----|---------|----|--------|----|-----|----|-----|--------|
| PM-01   | 3962       | 12 | 19 | 349   | 4  | 10  | 16 | 1305     | 9    | 5089   | 8597    | 3  | 354     | 9  | 803    | 6  | 7   | 2  | 4   | 269    |
| PM-02   | 1302       | 6  | 13 | 105   | 3  | 5   | 7  | 271      | 5    | 1260   | 4787    | 3  | 125     | 3  | 163    | 9  | 2   | 3  | 2   | 93     |
| PM-03   | 1059       | 5  | 11 | 72    | 3  | 5   | 7  | 238      | 3    | 835    | 2027    | 3  | 70      | 2  | 149    | 11 | 2   | 7  | 1   | 83     |
| PM-04   | 3874       | 8  | 19 | 125   | 6  | 10  | 22 | 2230     | 19   | 944    | 13339   | 3  | 342     | 7  | 893    | 10 | 9   | 6  | 4   | 424    |
| PM-05   | 5535       | 8  | 18 | 243   | 5  | 11  | 19 | 2897     | 21   | 2829   | 16060   | 3  | 507     | 7  | 1209   | 6  | 13  | 3  | 4   | 411    |
| PM-06   | 4692       | 6  | 11 | 283   | 4  | 12  | 13 | 1321     | 10   | 2754   | 11344   | 3  | 338     | 7  | 826    | 5  | 10  | 2  | 3   | 324    |
| PM-08   | 1330       | 6  | 7  | 62    | 3  | 6   | 11 | 335      | 4    | 852    | 2733    | 4  | 98      | 3  | 167    | 11 | 4   | 4  | 3   | 354    |
| PM-10   | 688        | 5  | 7  | 55    | 3  | 5   | 10 | 170      | 3    | 1061   | 1230    | 4  | 56      | 2  | 173    | 8  | 5   | 3  | 3   | 95     |
| PM-11   | 1873       | 6  | 9  | 114   | 3  | 12  | 10 | 611      | 5    | 1515   | 5003    | 4  | 154     | 3  | 309    | 11 | 11  | 5  | 4   | 234    |
| PM-12   | 2183       | 7  | 9  | 98    | 3  | 9   | 10 | 631      | 6    | 1394   | 5466    | 5  | 175     | 3  | 365    | 8  | 2   | 3  | 2   | 366    |
| PM-14   | 4010       | 4  | 8  | 91    | 3  | 8   | 8  | 716      | 6    | 603    | 8525    | 3  | 203     | 4  | 375    | 8  | 6   | 5  | 2   | 141    |
| PM-17   | 976        | 4  | 6  | 45    | 2  | 5   | 4  | 228      | 3    | 782    | 2500    | 2  | 68      | 3  | 142    | 7  | 3   | 4  | 1   | 66     |
| PM-19   | 3504       | 6  | 13 | 183   | 4  | 9   | 11 | 1277     | 13   | 1417   | 10799   | 3  | 357     | 8  | 611    | 9  | 8   | 4  | 4   | 72     |
| PM-22   | 12723      | 9  | 28 | 796   | 4  | 17  | 21 | 2333     | 16   | 3438   | 20869   | 3  | 892     | 10 | 1625   | 6  | 10  | —  | 8   | 263    |
| SM-D-01 | 40         | 1  | 1  | 4     | 1  | 2   | 2  | 8        | 1    | 18     | 39      | 1  | 2       | 1  | 10     | 2  | 1   | 2  | 1   | 3      |
| SM-D-02 | 8          | 0  | 0  | 0     | 1  | 1   | 0  | 2        | 1    | 2      | 10      | 2  | 1       | 1  | 1      | 1  | 2   | 1  | 1   | 1      |
| SM-D-03 | 24         | 1  | 2  | 2     | 1  | 2   | 1  | 4        | 1    | 5      | 54      | 1  | 1       | 1  | 7      | 4  | 1   | 1  | 1   | 1      |
| SM-D-05 | 20         | 1  | 1  | 3     | 1  | 2   | 1  | 4        | 1    | 6      | 31      | 1  | 1       | 1  | 6      | 5  | 1   | 2  | 1   | 4      |
| TS-01   | 168        | 1  | 1  | 1     | 1  | 2   | 1  | 15       | 2    | 5      | 27      | 1  | 1       | 1  | 3      | 1  | 1   | 1  | 1   | 11     |
| TS-02   | 17         | 1  | 1  | 3     | 1  | 2   | 1  | 9        | 2    | 7      | 44      | 2  | 1       | 1  | 3      | 4  | 1   | 1  | 1   | 248    |
| TS-03   | 38         | 1  | 1  | 1     | 1  | 2   | 1  | 3        | 1    | 4      | 35      | 1  | 1       | 1  | 2      | 2  | 1   | 1  | 1   | 1      |
| CFPP-07 | 25         | 2  | 1  | 4     | 1  | 2   | 1  | 4        | 2    | 6      | 48      | 1  | 3       | 2  | 3      | 0  | 1   | 0  | 0   | 5      |
| CFPP-08 | 28         | 1  | 1  | 3     | 1  | 6   | 1  | 3        | 1    | 4      | 192     | 3  | 1       | 2  | 2      | 1  | 1   | 0  | 0   | 11     |
| CP-03   | 502        | 7  | 19 | 6     | 3  | 5   | 5  | 16       | 2    | 14     | 112     | 4  | 299     | 20 | 6      | 84 | 1   | 2  | 0   | 34     |
| CP-04   | 26         | 1  | 1  | 1     | 1  | 2   | 1  | 2        | 1    | 7      | 65      | 0  | 1       | 1  | 1      | 3  | 1   | 1  | 0   | 1      |
| CP-05   | 10         | 1  | 1  | 1     | 1  | 1   | 1  | 1        | 1    | 1      | 17      | 0  | 1       | 1  | 1      | 0  | 1   | 0  | 0   | 0      |
| CP-10   | 149        | 5  | 25 | 5     | 3  | 4   | 5  | 12       | 2    | 12     | 60      | 3  | 1       | 26 | 8      | 68 | 1   | 2  | 0   | 0      |
| SP-01   | 87570416   | 9  | 3  | 541   | 5  | 20  | 3  | 2488020  | 147  | 19694  | 331752  | 2  | 3467    | 1  | 130705 | 5  | 48  | 4  | 8   | 258    |
| SP-02   | 1095027659 | 48 | 28 | 10070 | 28 | 116 | 37 | 38515102 | 1361 | 686994 | 4661642 | 14 | 2437629 | 1  | 66158  | 12 | 490 | 28 | 114 | 226070 |
| SP-04   | 1028376    | 10 | 19 | 802   | 20 | 3   | 15 | 186101   | 2    | 4515   | 8098    | 7  | 540     | 1  | 4863   | 13 | 1   | 4  | 1   | 203    |

**Table S5.** Factor (F) loadings of the extracted factors for PM<sub>2.5</sub> samples from Beijing urban area of China. Four factors account for 93% of the Explained Variance (Expl. Var.).

|                    | <b>F-1</b>  | <b>F-2</b>  | <b>F-3</b>  | <b>F-4</b>  |
|--------------------|-------------|-------------|-------------|-------------|
| Hg                 | 0.59        | 0.62        | 0.38        | -0.14       |
| Pb                 | <b>0.97</b> | 0.05        | 0.14        | 0.13        |
| Rb                 | <b>0.97</b> | 0.05        | 0.14        | 0.13        |
| Se                 | <b>0.89</b> | 0.03        | 0.35        | 0.20        |
| Zn                 | <b>0.86</b> | 0.03        | 0.46        | 0.18        |
| Tl                 | <b>0.85</b> | 0.03        | 0.49        | 0.17        |
| Cr                 | <b>0.79</b> | 0.31        | 0.45        | 0.04        |
| Cd                 | <b>0.78</b> | 0.06        | 0.48        | 0.21        |
| Fe                 | <b>0.77</b> | 0.53        | 0.23        | 0.12        |
| Ni                 | <b>0.75</b> | 0.46        | 0.34        | 0.11        |
| V                  | 0.66        | 0.02        | 0.63        | 0.22        |
| Ca                 | -0.13       | <b>0.96</b> | -0.14       | 0.22        |
| Sr                 | 0.05        | <b>0.93</b> | 0.23        | -0.09       |
| Al                 | 0.10        | <b>0.85</b> | 0.21        | 0.13        |
| Mg                 | 0.03        | <b>0.84</b> | -0.38       | 0.22        |
| Co                 | 0.38        | 0.67        | 0.58        | -0.09       |
| Li                 | 0.42        | 0.62        | 0.49        | 0.29        |
| Sb                 | 0.34        | 0.13        | <b>0.89</b> | 0.16        |
| Cu                 | 0.50        | -0.02       | <b>0.83</b> | 0.24        |
| PM <sub>2.5</sub>  | 0.60        | 0.04        | <b>0.74</b> | 0.19        |
| EC                 | 0.42        | 0.48        | <b>0.72</b> | 0.10        |
| K                  | 0.53        | 0.18        | 0.27        | <b>0.78</b> |
| Na                 | 0.26        | 0.47        | 0.34        | <b>0.66</b> |
| % of Expl.<br>Var. | 39          | 24          | 23          | 7           |

**Figure S1.** NOAA-HYSPLIT model (<http://ready.arl.noaa.gov>) results illustrate air mass back trajectories for PM<sub>2.5</sub> samples collected in Winter.

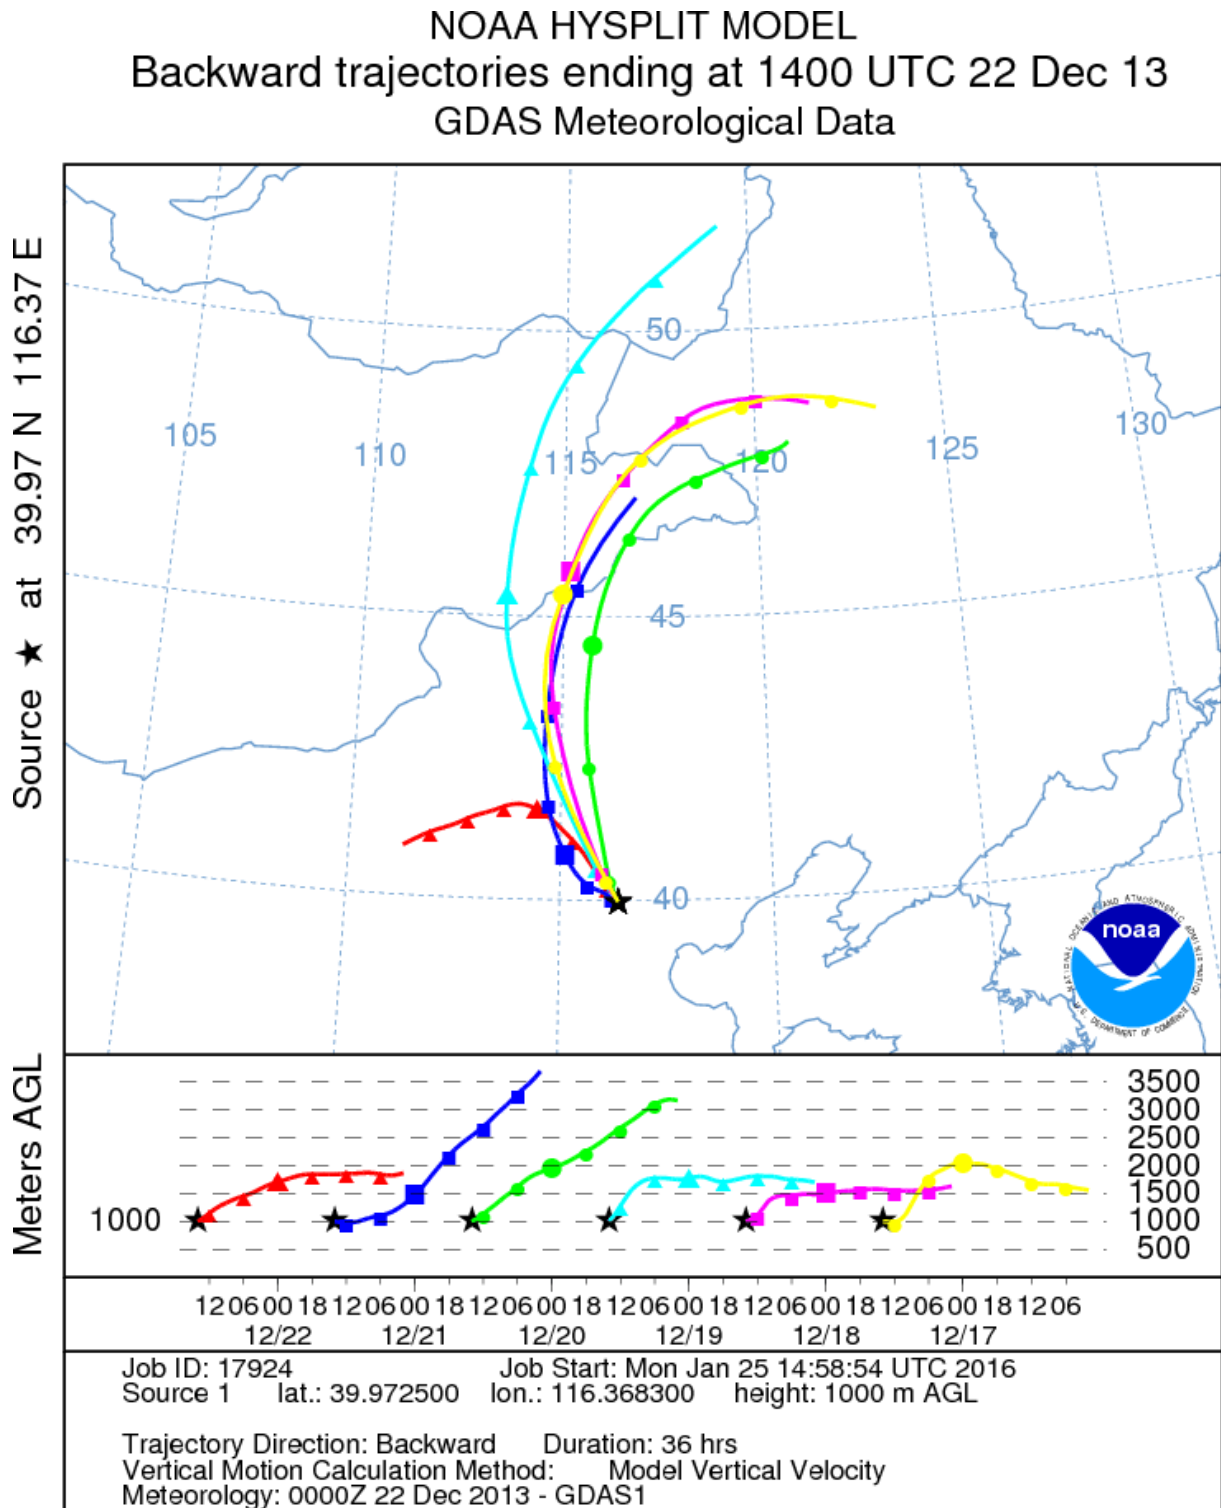

70 **Figure S2.** NOAA-HYSPLIT model ([http://ready.arl.noaa.gov.](http://ready.arl.noaa.gov)) results illustrated air mass back trajectories for PM<sub>2.5</sub> samples collected in Autumn (from 30 Sep to 5 Oct 2013).  $\Delta^{199}\text{Hg}$  values were also land-marked on the corresponding trajectories.

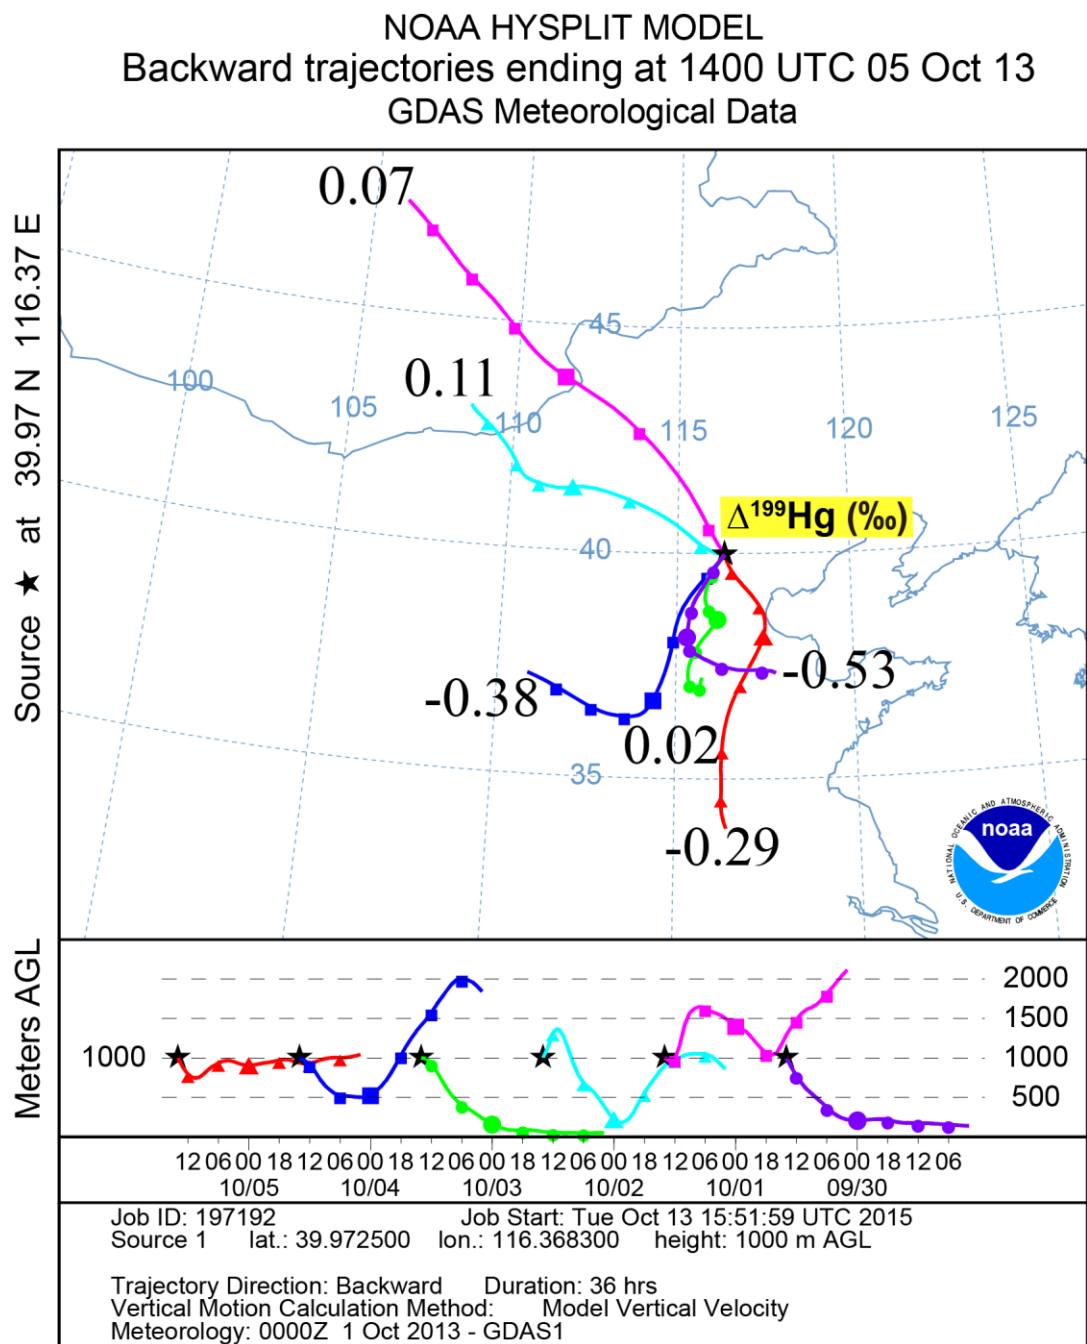

**Figure S3.** NOAA-HYSPLIT model (<http://ready.arl.noaa.gov>) results illustrate air mass

75 back trajectories for PM<sub>2.5</sub> samples collected in Spring.

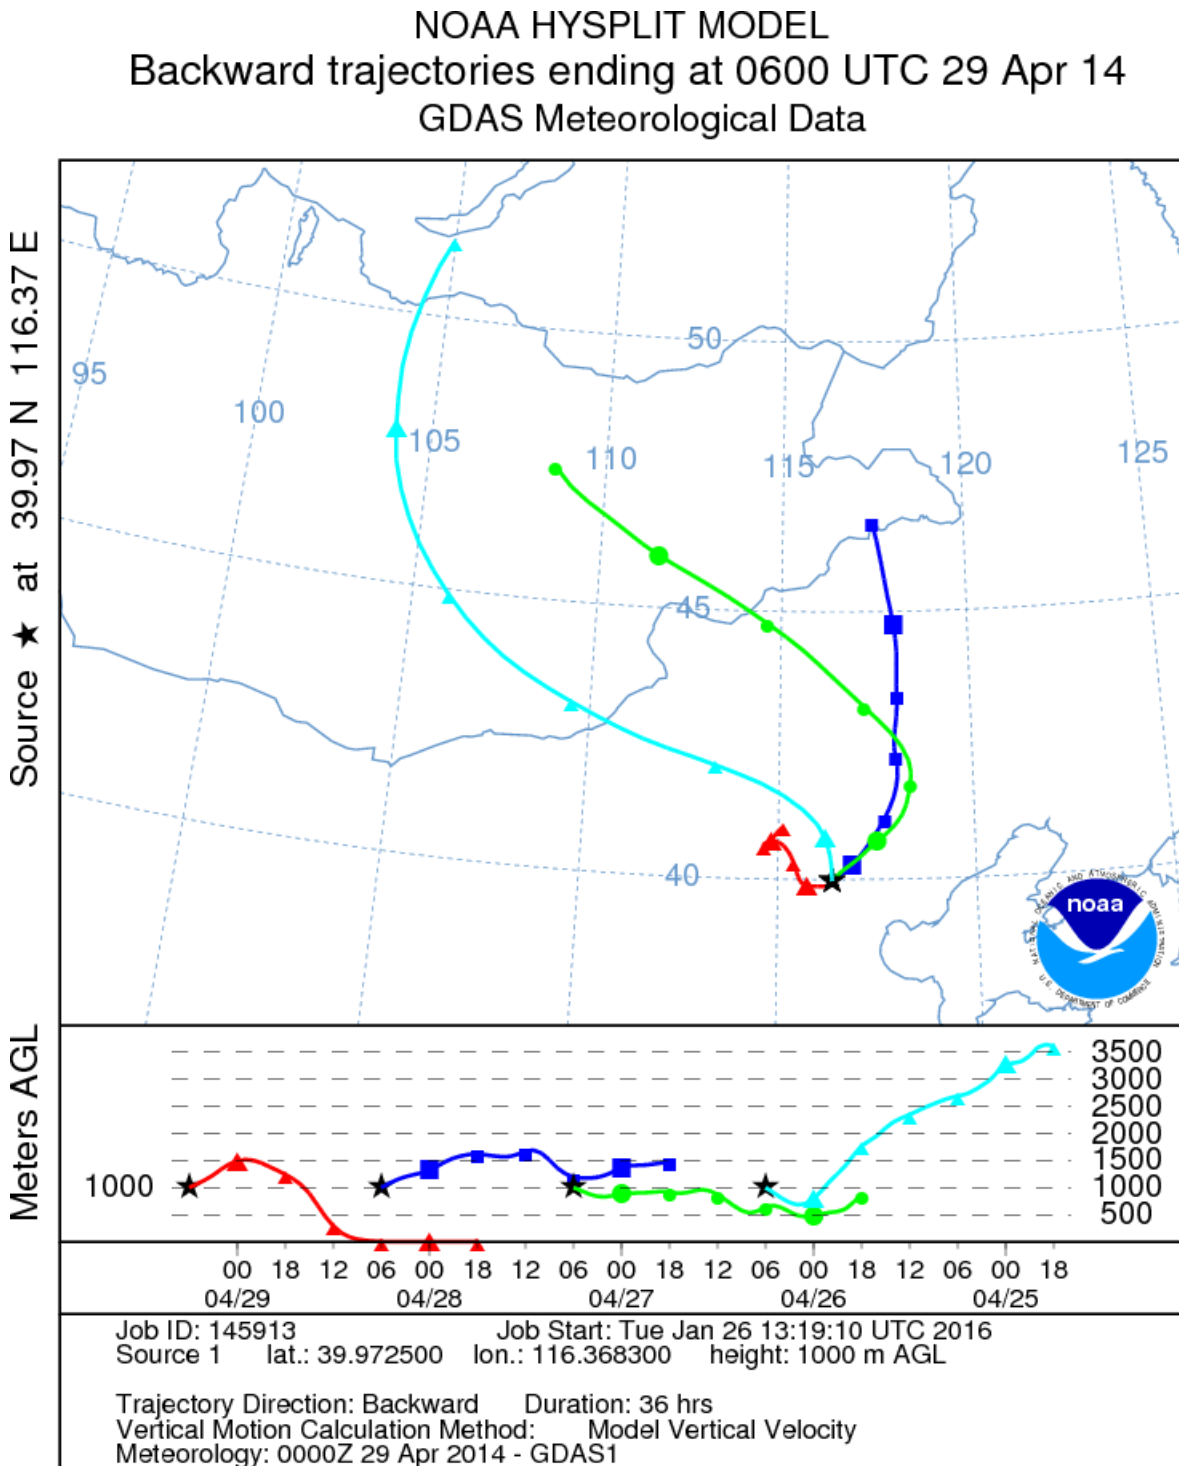

**Figure S4.** NOAA-HYSPLIT model (<http://ready.arl.noaa.gov>) results illustrate air mass back trajectories for PM<sub>2.5</sub> samples collected in early Summer.

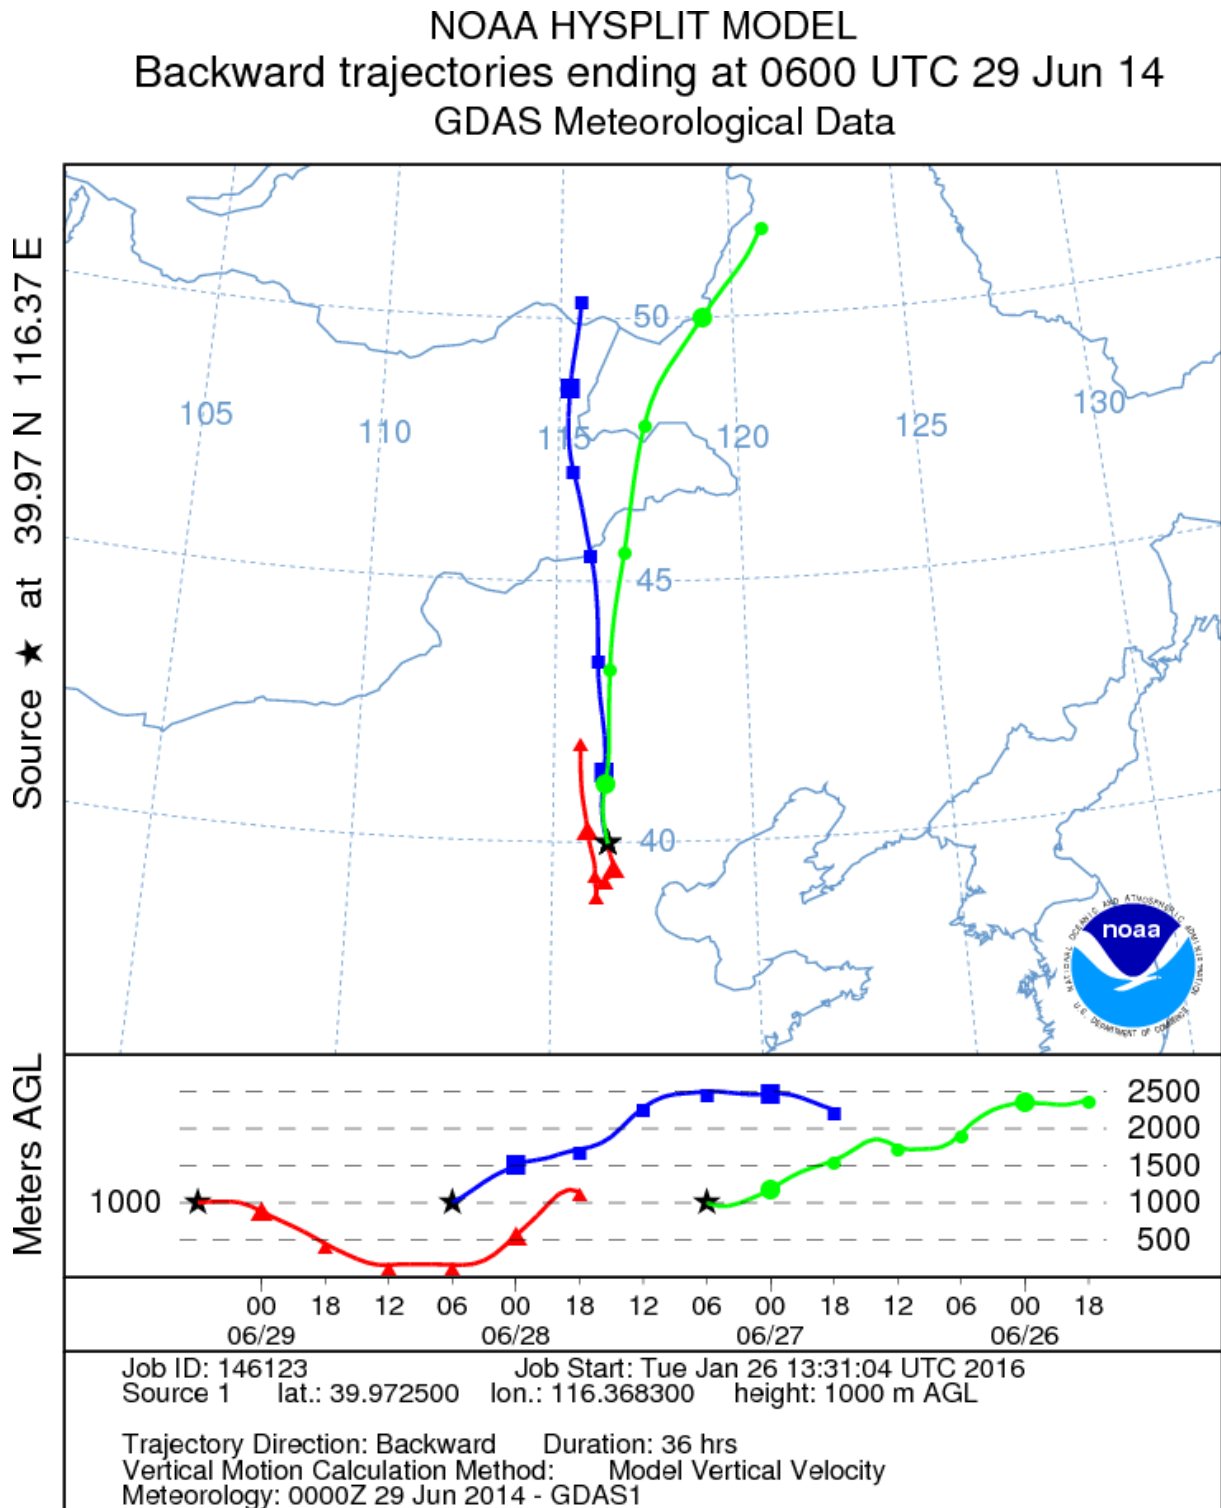

80 **REFERENCES**

- Cao, J. J., Lee, S. C., Ho, K. F., Zou, S. C., Fung, K., Li, Y., Watson, J. G., and Chow, J. C.: Spatial and seasonal variations of atmospheric organic carbon and elemental carbon in Pearl River Delta Region, China, *Atmos. Environ.*, 38, 4447-4456, <http://dx.doi.org/10.1016/j.atmosenv.2004.05.016>, 2004.
- 85 Castro, L. M., Pio, C. A., Harrison, R. M., and Smith, D. J. T.: Carbonaceous aerosol in urban and rural European atmospheres: Estimation of secondary organic carbon concentrations, *Atmos. Environ.*, 33, 2771-2781, [http://dx.doi.org/10.1016/S1352-2310\(98\)00331-8](http://dx.doi.org/10.1016/S1352-2310(98)00331-8), 1999.
- Chen, J. B., Gaillardet, J., Bouchez, J., Louvat, P., and Wang, Y. N.: Anthropophile elements in river sediments: Overview from the Seine River, France, *Geochem. Geophys. Geosyst.*,  
90 15, 4526-4546, 2014.
- Lin, Y.-C., Hsu, S.-C., Chou, C. C.-K., Zhang, R., Wu, Y., Kao, S.-J., Luo, L., Huang, C.-H., Lin, S.-H., and Huang, Y.-T.: Wintertime haze deterioration in Beijing by industrial pollution deduced from trace metal fingerprints and enhanced health risk by heavy metals, *Environ. Pollut.*, 208, 284-293, 2016.
- 95 Rengarajan, R., Sudheer, A., and Sarin, M.: Aerosol acidity and secondary organic aerosol formation during wintertime over urban environment in western India, *Atmos. Environ.*, 45, 1940-1945, 2011.
- Rudnick, R., and Gao, S.: Composition of the continental crust, *Treatise on Geochemistry*, 3, 1-64, 2003.
- 100 Schleicher, N., Norra, S., Chen, Y., Chai, F., and Wang, S.: Efficiency of mitigation measures to reduce particulate air pollution: A case study during the Olympic Summer Games 2008 in Beijing, China, *Sci. Total Environ.*, 427-428, 146-158, <http://dx.doi.org/10.1016/j.scitotenv.2012.04.004>, 2012.
- Schleicher, N. J., Schäfer, J., Blanc, G., Chen, Y., Chai, F., Cen, K., and Norra, S.:  
105 Atmospheric particulate mercury in the megacity Beijing: Spatio-temporal variations and source apportionment, *Atmos. Environ.*, 109, 251-261, doi: 10.1016/j.atmosenv.2015.03.018, 2015.
- Visser, S., Slowik, J., Furger, M., Zotter, P., Bukowiecki, N., Dressler, R., Flechsig, U., Appel,

- 110 K., Green, D., and Tremper, A.: Kerb and urban increment of highly time-resolved trace  
elements in PM 10, PM 2.5 and PM 1.0 winter aerosol in London during ClearfLo 2012,  
*Atmos. Chem. Phys.*, 15, 2367-2386, 2015.
- Wang, Z., Chen, J., Feng, X., Hintelmann, H., Yuan, S., Cai, H., Huang, Q., Wang, S., and  
Wang, F.: Mass-dependent and mass-independent fractionation of mercury isotopes in  
precipitation from Guiyang, SW China, *C. R. Geosci.*, 347, 358-367, doi:  
115 10.1016/j.crte.2015.02.006, 2015.
- Xu, H., Cao, J., Ho, K., Ding, H., Han, Y., Wang, G., Chow, J., Watson, J., Khol, S., and  
Qiang, J.: Lead concentrations in fine particulate matter after the phasing out of leaded  
gasoline in Xi'an, China, *Atmos. Environ.*, 46, 217-224, 2012.
- Yu, S., Dennis, R. L., Bhave, P. V., and Eder, B. K.: Primary and secondary organic aerosols  
120 over the United States: Estimates on the basis of observed organic carbon (OC) and  
elemental carbon (EC), and air quality modeled primary OC/EC ratios, *Atmos. Environ.*, 38,  
5257-5268, <http://dx.doi.org/10.1016/j.atmosenv.2004.02.064>, 2004.
- Zhang, Y., Wang, X., Chen, H., Yang, X., Chen, J., and Allen, J. O.: Source apportionment of  
lead-containing aerosol particles in Shanghai using single particle mass spectrometry,  
125 *Chemosphere*, 74, 501-507, 2009.
- Zheng, M., Salmon, L. G., Schauer, J. J., Zeng, L., Kiang, C. S., Zhang, Y., and Cass, G. R.:  
Seasonal trends in PM<sub>2.5</sub> source contributions in Beijing, China, *Atmos. Environ.*, 39,  
3967-3976, doi: 10.1016/j.atmosenv.2005.03.036, 2005a.
- Zheng, X., Liu, X., Zhao, F., Duan, F., Yu, T., and H, C.: Seasonal characteristics of biomass  
130 burning contribution to Beijing aerosol, *Sci. China Ser. B*, 48, 481-488, doi:  
10.1360/042005-15, 2005b.
